# Supplementary material
Source: publisher figshare collection journal article supplement (https://tandf.figshare.com/ndownloader/files/12759605)
Supplement: Supplementary file 1 [file 12759605]

**Supplementary Table 1:**
Summary of current clinical trials with anti-CD20 antibodies in combination with other agents.
